# Supplementary material for: Synthesis of Zwitter-Ionic Conjugate of Nido-Carborane with Cholesterol
Source: MDPI journal article supplement (doi:10.3390/molecules26216687), 2021-11-05
Supplement: s1 [file s1]

## SUPPORTING INFORMATION

### Synthesis of zwitter-ionic conjugate of *nido*-carborane with cholesterol

Anna A. Druzina<sup>1,\*</sup>, Olga B. Zhidkova<sup>1</sup>, Nadezhda V. Dudarova<sup>1</sup>, Natalia A. Nekrasova<sup>1,2</sup>, Kyrill Yu. Suponitsky<sup>1,3</sup>, Sergey V. Timofeev<sup>1</sup> and Vladimir I. Bregadze<sup>1</sup>

<sup>1</sup> A.N. Nesmeyanov Institute of Organoelement Compounds, Russian Academy of Sciences, 28 Vavilov Str., 119991 Moscow, Russia; Zolga57@mail.ru (O.B.Z.); nadezjdino\_96@mail.ru (N.V.D.); neksova\_na@list.ru (N.A.N.); kirshik@yahoo.com (K.Yu.S.); timofeev@ineos.ac.ru (S.V.T.); bre@ineos.ac.ru (V.I.B).

<sup>2</sup> M.V. Lomonosov Institute of Fine Chemical Technology, MIREA - Russian Technological University, 86 Vernadsky Av., 119571, Moscow, Russia; neksova\_na@list.ru (N.A.N.)

<sup>3</sup> G.V. Plekhanov Russian University of Economics, 36 Stremyanniy Line, 117997, Moscow, Russia; kirshik@yahoo.com (K.Yu.S.)

\* Correspondence: ilinova\_anna@mail.ru; Tel.: +7-926-404-5566 (A.A.D.)

<sup>1</sup>H, <sup>11</sup>B and <sup>13</sup>C NMR, IR and high-resolution mass spectra of compounds **6**

## Display Report

### Analysis Info

Analysis Name D:\Data\Chizhov\INEOS\Laskova\da-041\_&clb.d  
Method tune\_wide.m  
Sample Name /CHIZ DA-041  
Comment CH3CN 100 %, dil. 200, calibrant added

Acquisition Date 29.09.2020 15:27:17

Operator BDAL@DE  
Instrument maXis 43

### Acquisition Parameter

|             |          |                       |            |                  |           |
|-------------|----------|-----------------------|------------|------------------|-----------|
| Source Type | ESI      | Ion Polarity          | Positive   | Set Nebulizer    | 0.5 Bar   |
| Focus       | Active   | Set Capillary         | 4500 V     | Set Dry Heater   | 180 °C    |
| Scan Begin  | 50 m/z   | Set End Plate Offset  | -500 V     | Set Dry Gas      | 4.0 l/min |
| Scan End    | 3000 m/z | Set Collision Cell RF | 1200.0 Vpp | Set Divert Valve | Waste     |

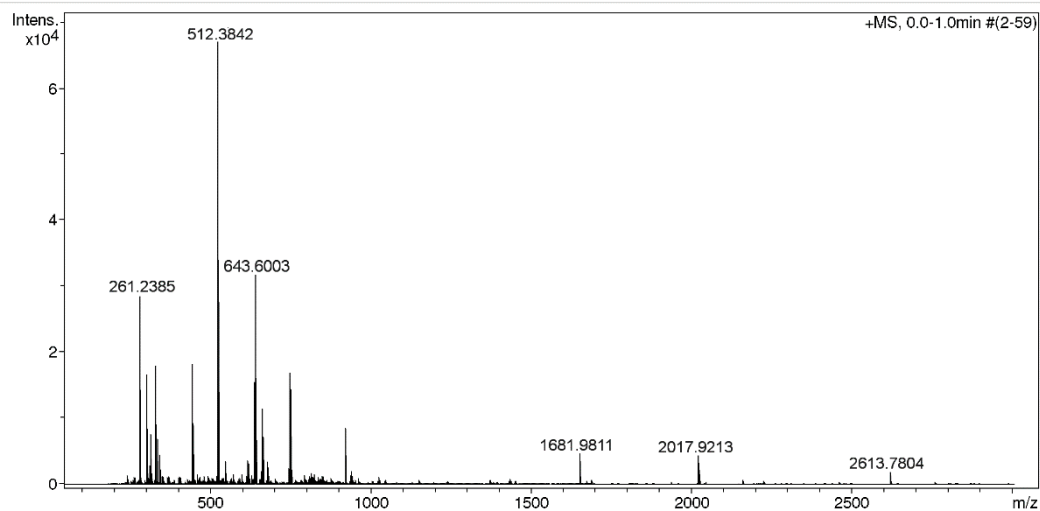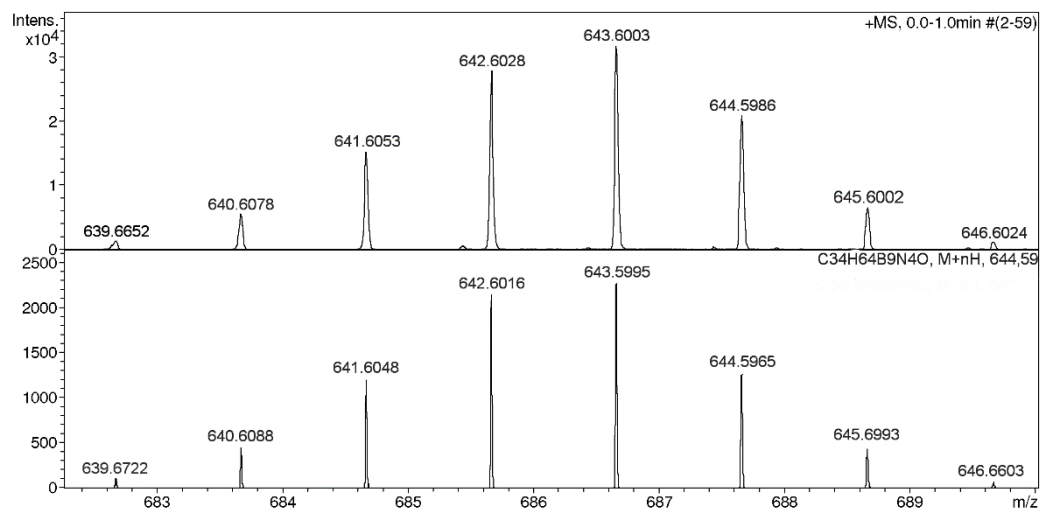

Figure S1. ESI-HRMS spectrum of compound 6

## Compound 6

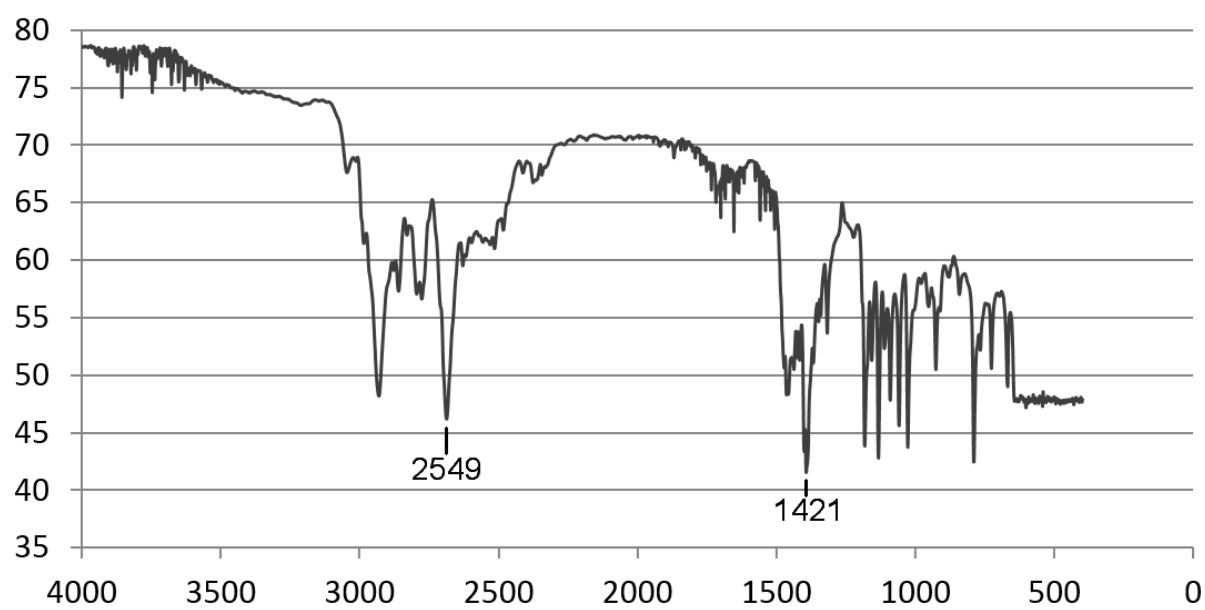

Figure S2. IR spectrum of compound 6

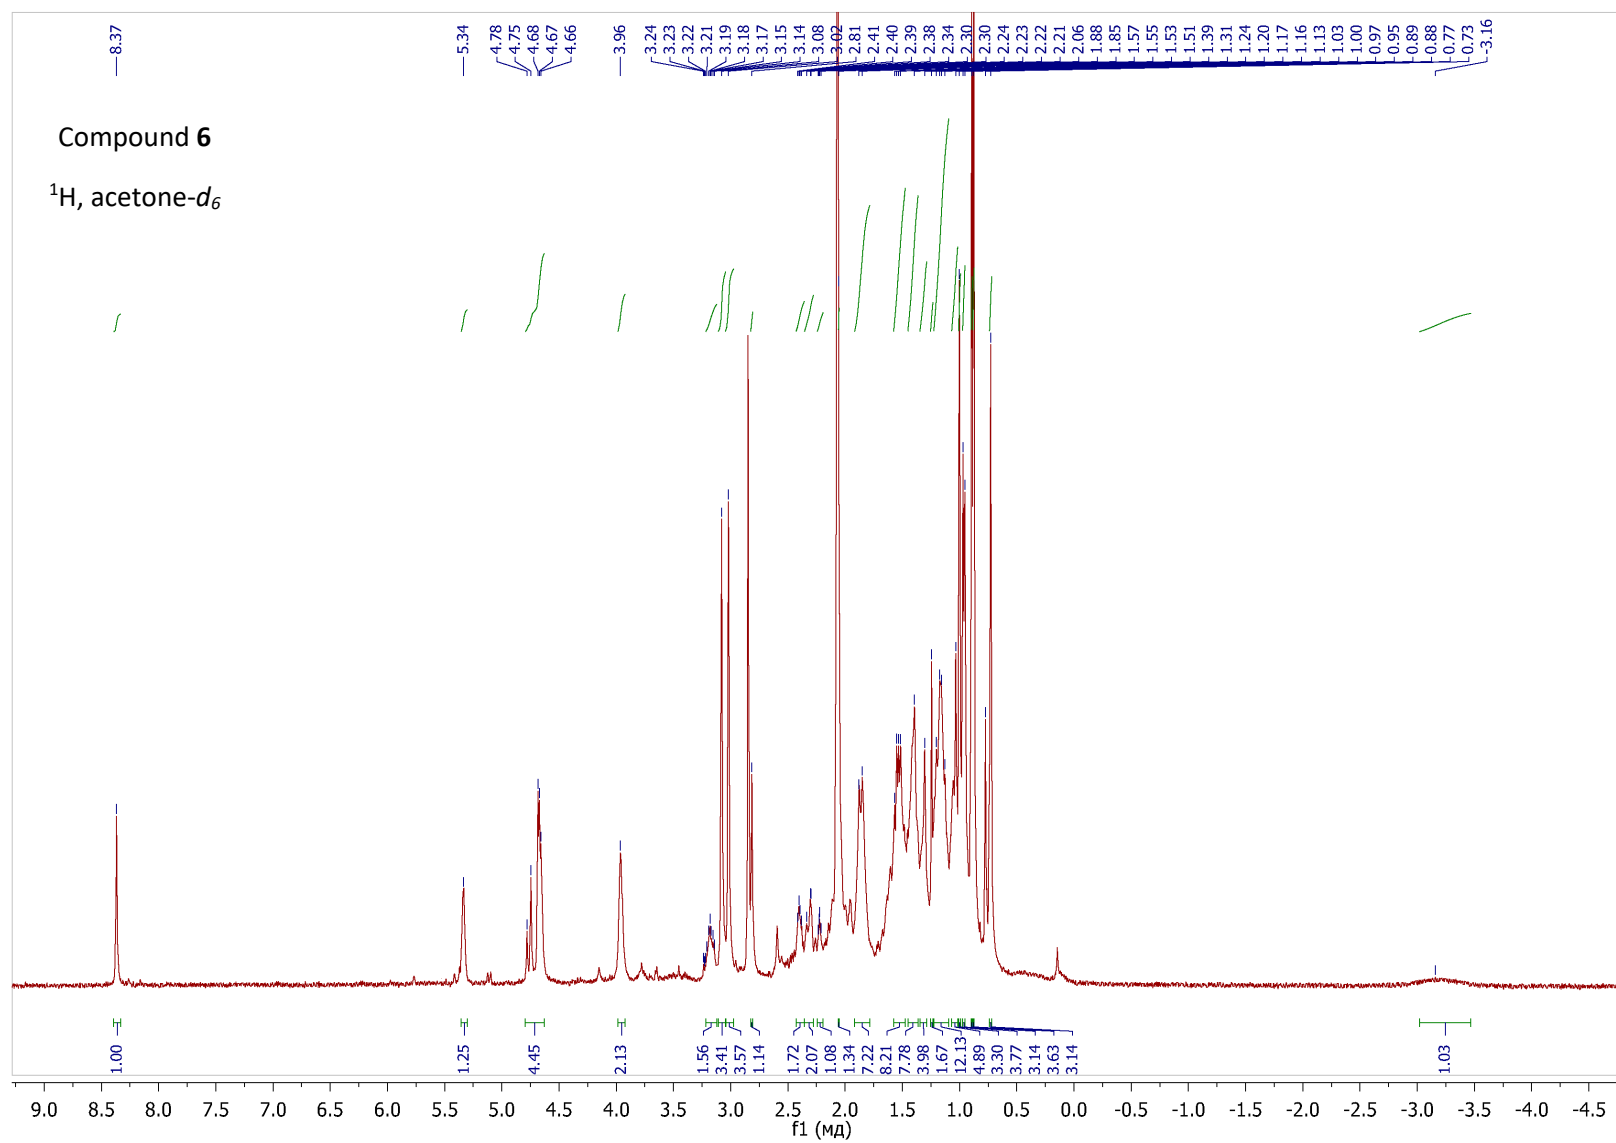

Figure S3.  $^1\text{H}$  NMR spectrum of compound **6**

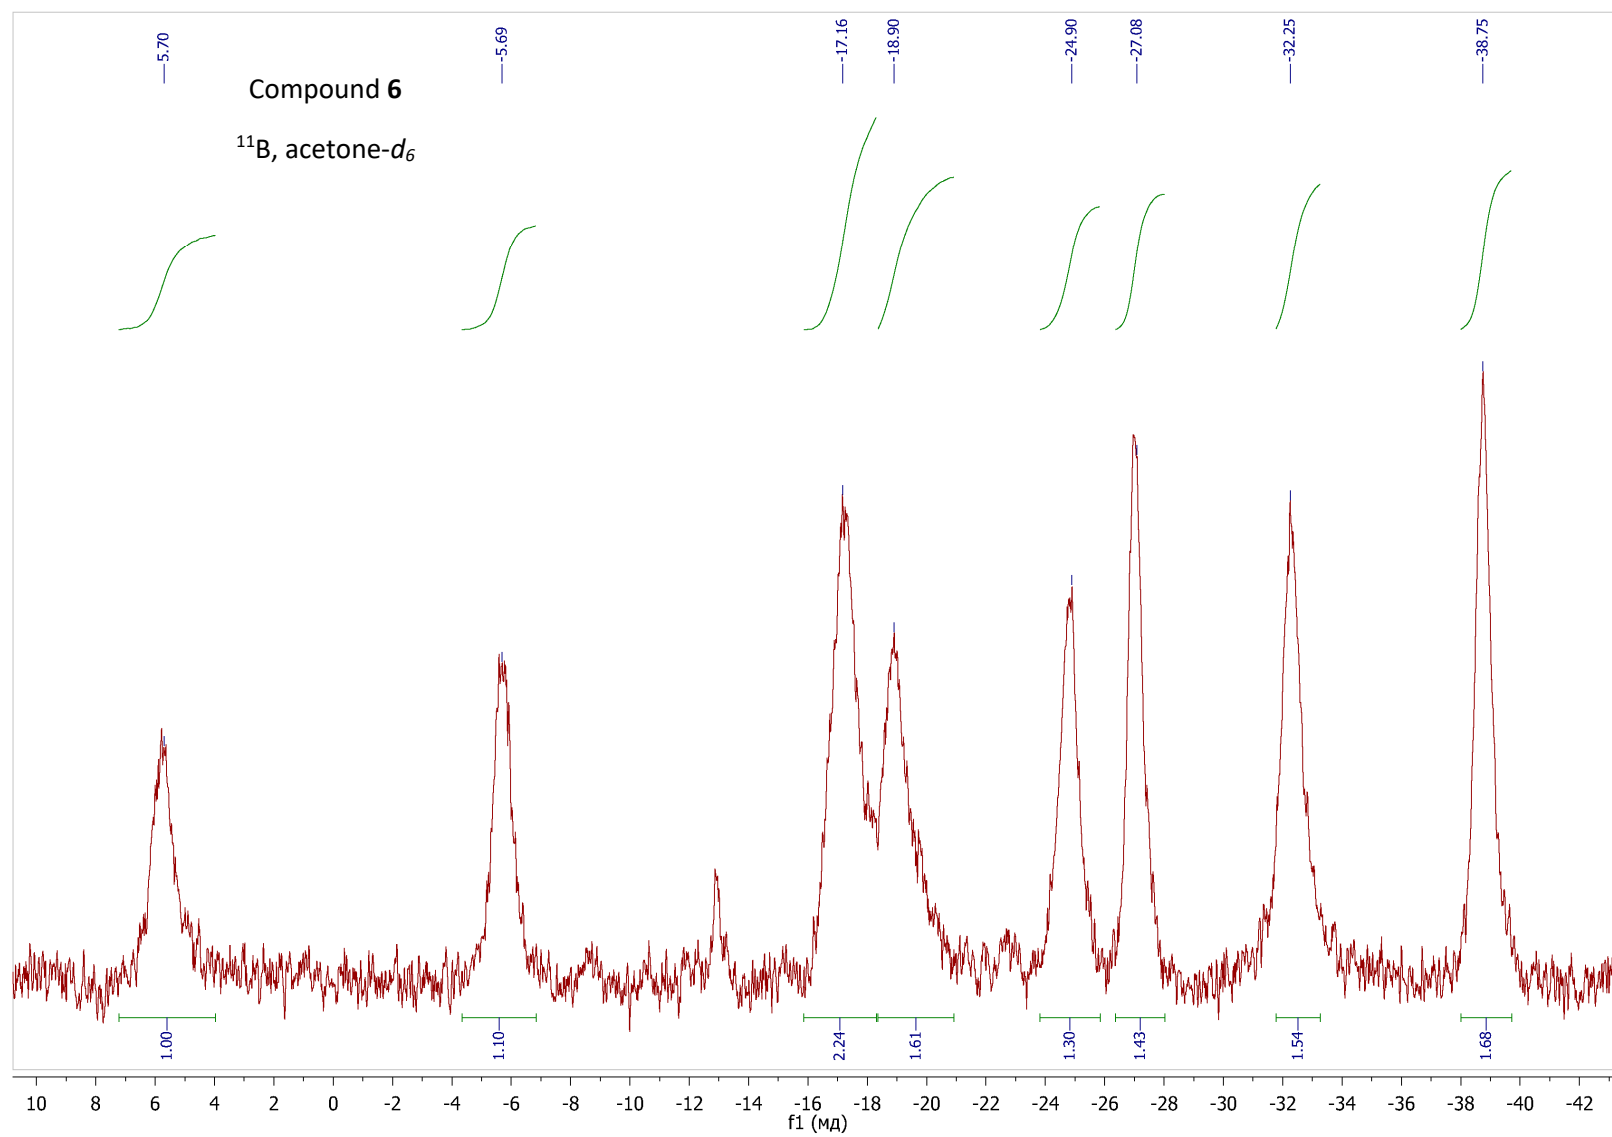

**Figure S4.**  $^{11}\text{B}\{^1\text{H}\}$  NMR spectrum of compound **6**

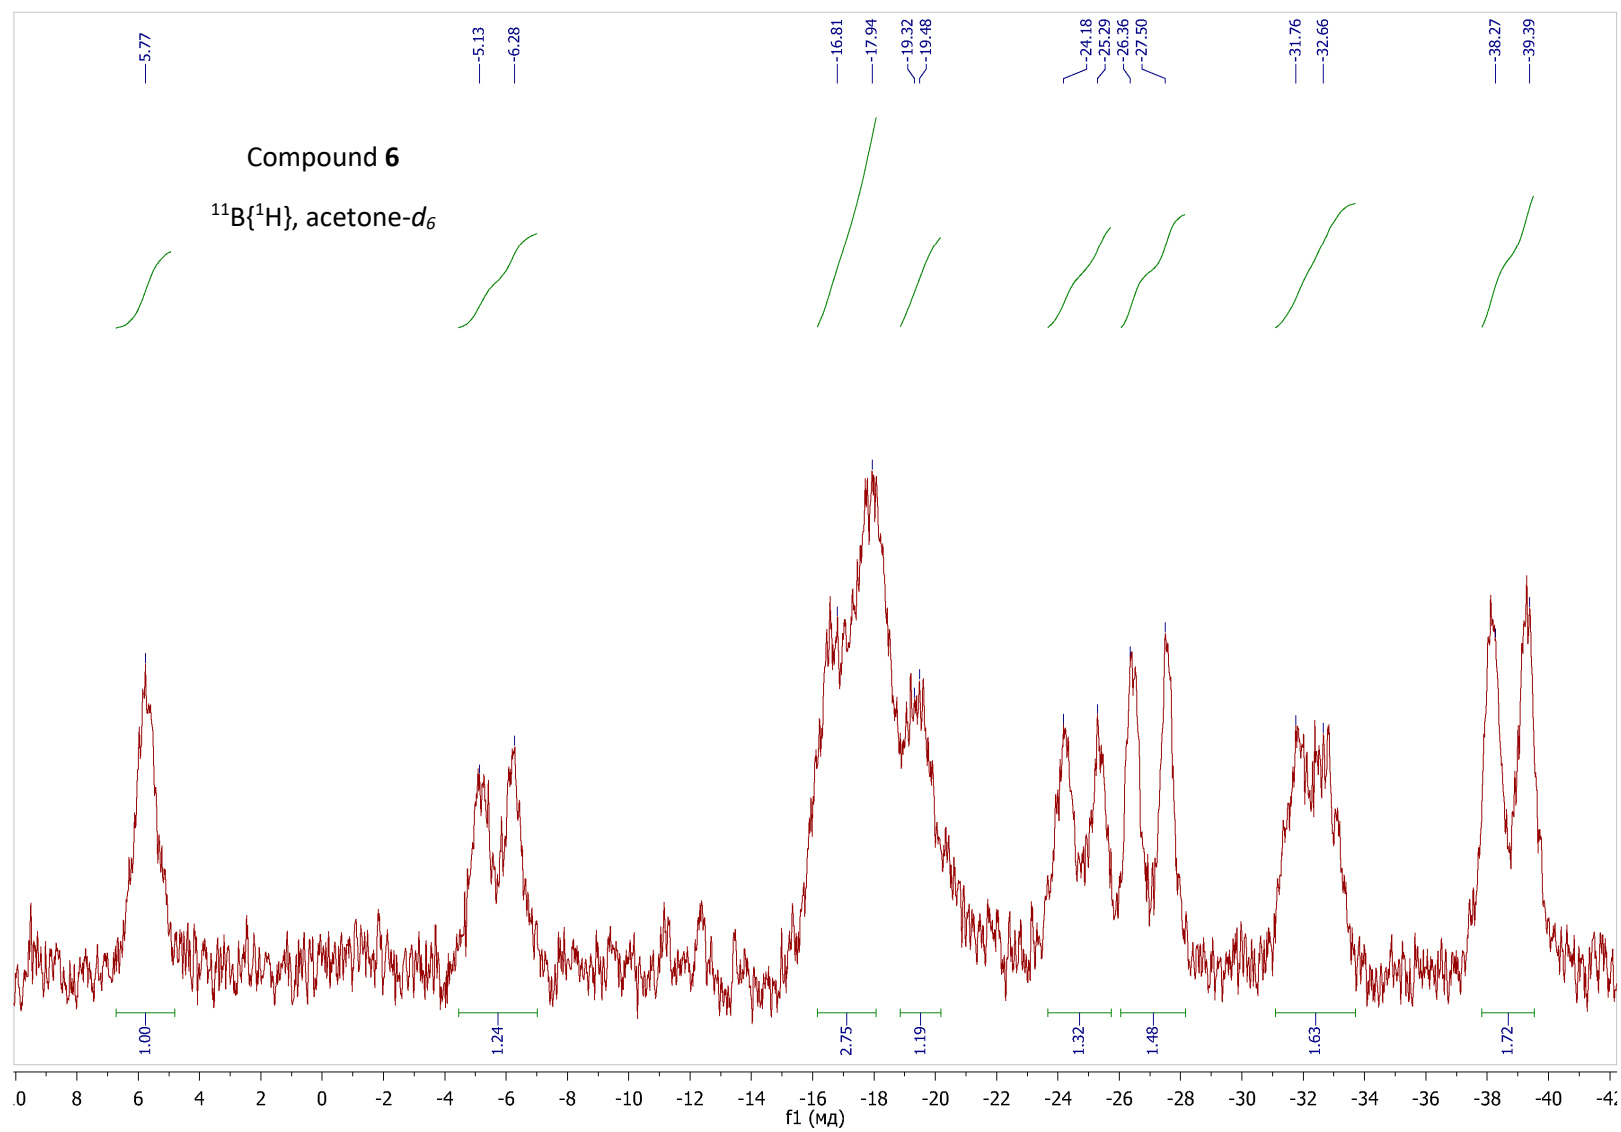

Figure S5.  $^{11}\text{B}$  NMR spectrum of compound 6

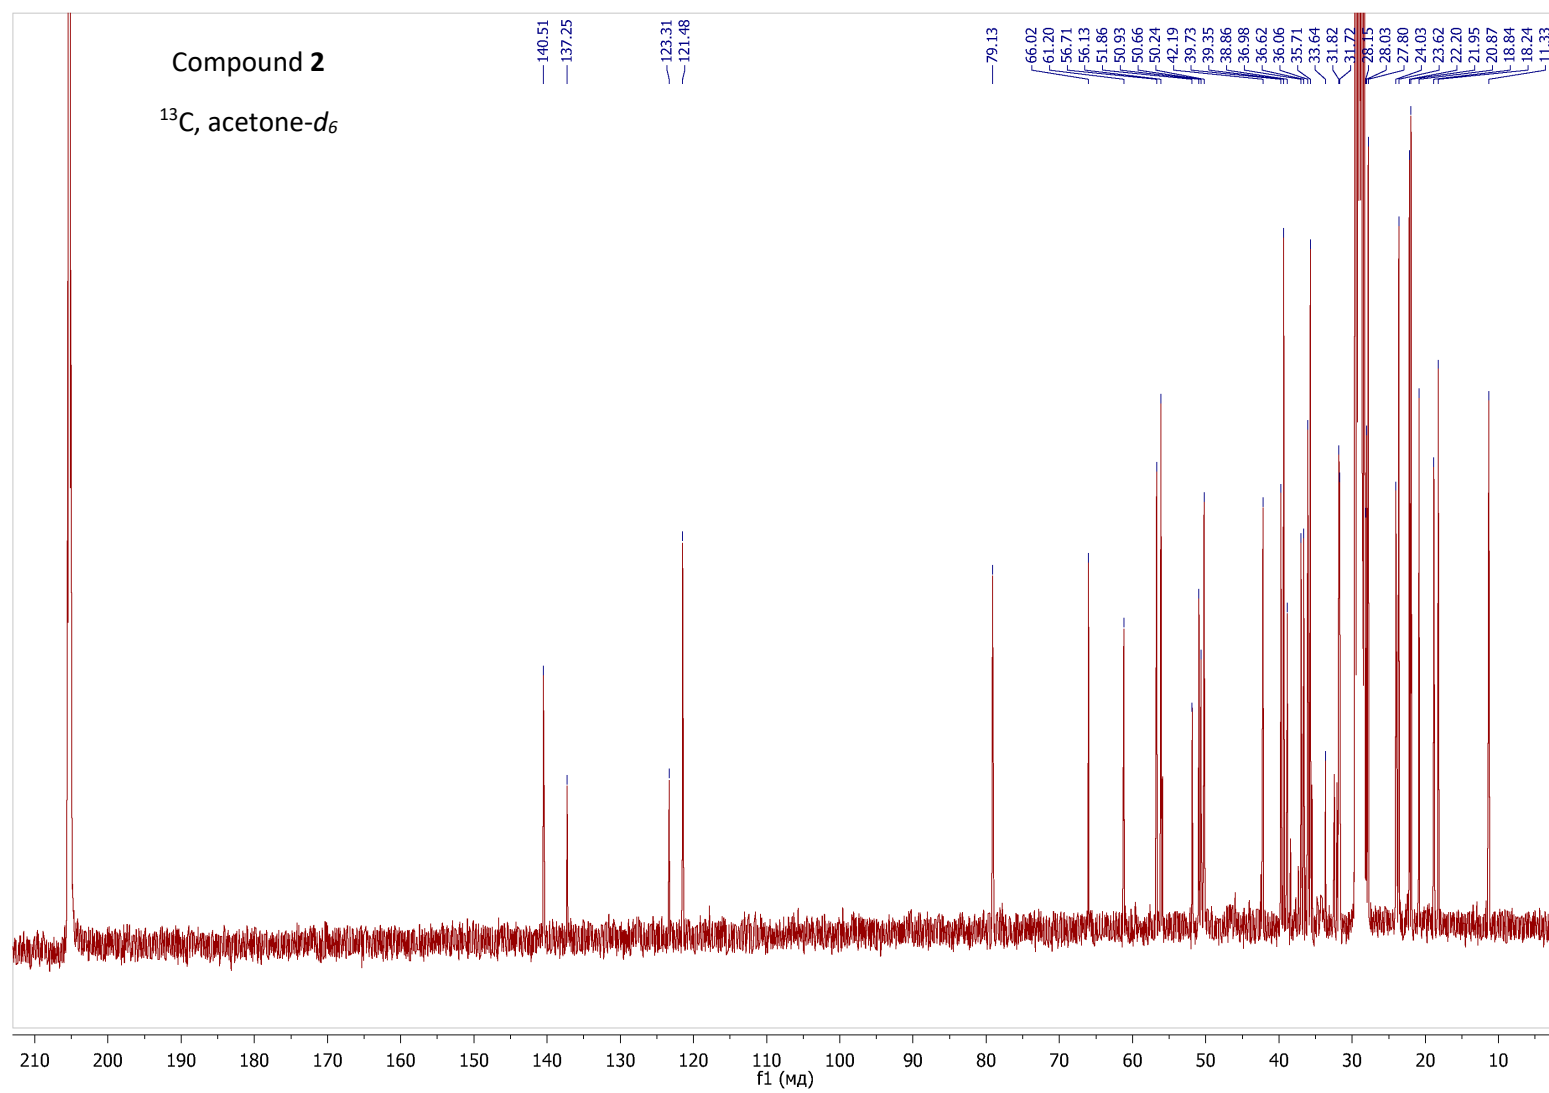

Figure S6.  $^{13}\text{C}$  NMR spectrum of compound 6
